# Supplementary material for: Organisational culture and post-merger integration in an academic health centre: a mixed-methods study
Source: Springer Nature journal article supplement (doi:10.1186/s12913-014-0673-3), 2015-01-21
Supplement: MOESM1 [file 9756930]

### Additional file 1 Interviews and data collected

| No.          | Respondent role                  | Interview date | Interview time | Transcribed pages |
|--------------|----------------------------------|----------------|----------------|-------------------|
| 1            | Musculoskeletal science          | 05-01-2012     | 82 min         | 34                |
| 2            | Surgery                          | 06-01-2012     | 73 min         | 30                |
| 3            | Rehabilitation                   | 09-01-2012     | 76 min         | 32                |
| 4            | Research management and training | 12-01-2012     | 48 min         | 20                |
| 5            | Physiotherapy                    | 13-01-2012     | 68 min         | 28                |
| 6            | Surgery                          | 13-01-2012     | 54 min         | 23                |
| <i>Total</i> |                                  |                | <i>401 min</i> | <i>167</i>        |
